# Supplementary material
Source: publisher figshare collection journal article supplement (https://frontiersin.figshare.com/ndownloader/files/29152509)
Supplement: Supplementary file 1 [file 29152509]

Supplementary Material

**Supplementary Table S2**: Temperature coefficients (Q10) at increasing temperature (20-24, 24-28, 28-32°C) for standard metabolic rate, maximum metabolic rate, aerobic scope, critical swimming speed (*U*crit), optimal swimming speed, minimum cost of transport (COTmin), and cost of transport at *U*crit (COT*U*CRIT). Q10 was calculated using the formula Q10=(k2-k1)10/(t2-t1), where k1 and k2 are the rate constants at t1 and t2, respectively (Kieffer et al., 1998). See primary text for units associated with each endpoint.

| **Measured endpoint** | **Temperature (°C)** | **Q10** |
| --- | --- | --- |
| Standard metabolic rate | 20-24°C | 1.63 |
|  | 24-28°C | 1.51 |
|  | 28-32°C | 2.49 |
| Maximum metabolic rate | 20-24°C | 2.86 |
|  | 24-28°C | 1.97 |
|  | 28-32°C | 1.12 |
| Aerobic scope | 20-24°C | 3.83 |
|  | 24-28°C | 2.19 |
|  | 28-32°C | 0.76 |
| *U*crit | 20-24°C | 1.51 |
|  | 24-28°C | 1.50 |
|  | 28-32°C | 0.52 |
| *U*opt | 20-24°C | 0.98 |
|  | 24-28°C | 1.69 |
|  | 28-32°C | 0.77 |
| COTmin | 20-24°C | 1.39 |
|  | 24-28°C | 1.28 |
|  | 28-32°C | 2.17 |
| COT*U*CRIT | 20-24°C | 3.08 |
|  | 24-28°C | 1.06 |
|  | 28-32°C | 1.45 |
| Factorial aerobic scope | 20-24°C | 1.57 |
|  | 24-28°C | 1.34 |
|  | 28-32°C | 0.47 |
|  | 20-28°C | 1.45 |
